# Supplementary material
Source: Springer Nature journal article supplement (https://www.springermedizin.de/resource/supplementary/12950_2010_194_MOESM6_ESM.pdf/9558172)

|                                              |          |          |             |           |           |            |
|----------------------------------------------|----------|----------|-------------|-----------|-----------|------------|
| <b>LPS (100 ng/ml)</b>                       | <b>-</b> | <b>+</b> | <b>+</b>    | <b>+</b>  | <b>+</b>  | <b>+</b>   |
| <b>Arctiin (<math>\mu\text{g/ml}</math>)</b> | <b>-</b> | <b>-</b> | <b>12.5</b> | <b>25</b> | <b>50</b> | <b>100</b> |

**p- I $\kappa$ B $\alpha$**

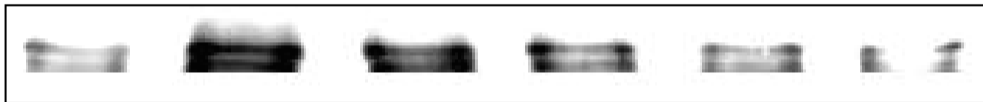

**nuclear p65**

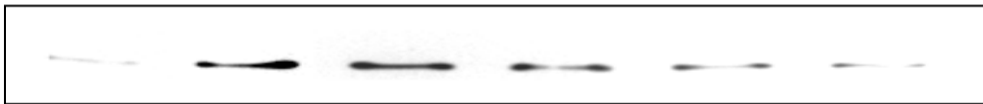

**$\beta$ -actin**

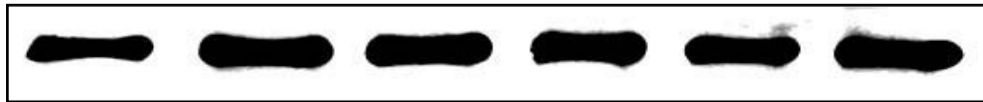

Supplement: MOESM6 [file 9558172]
